# Supplementary material for: Rapid Antibiotic Susceptibility Testing of Gram-Negative Bacteria Directly from Urine Samples of UTI Patients Using MALDI-TOF MS
Source: MDPI journal article supplement (doi:10.3390/antibiotics12061042), 2023-06-12
Supplement: s1 [file s1]

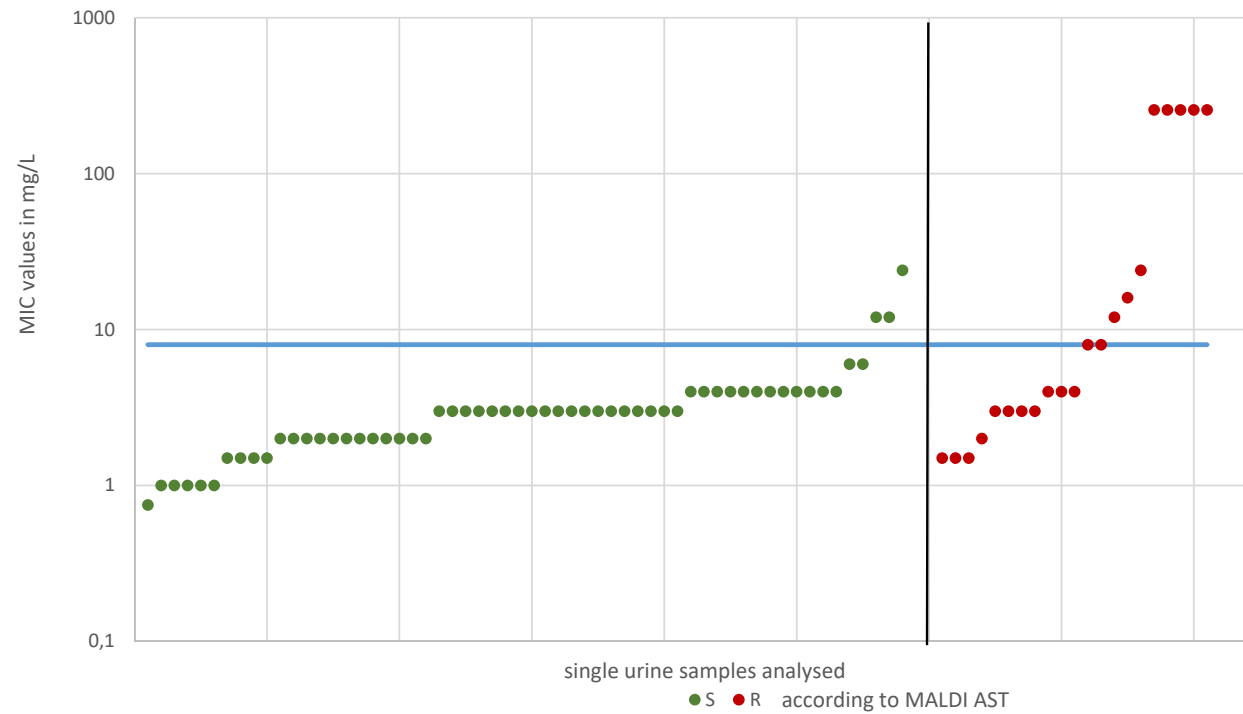

**Figure S1.** Cefuroxime results: Each bacteria sample from a patient's urine (on the X-axis) is assigned a respective MIC value from the MIC test strip (on the Y-axis). Each dot represents one sample. All samples are grouped by MALDI AST results (S, R) and ascending MIC values. Green dots indicate a susceptible result, and red dots indicate a resistant result in the MALDI AST assay (separated by the black line). The MIC value breakpoints is 8 mg/L (blue lines).

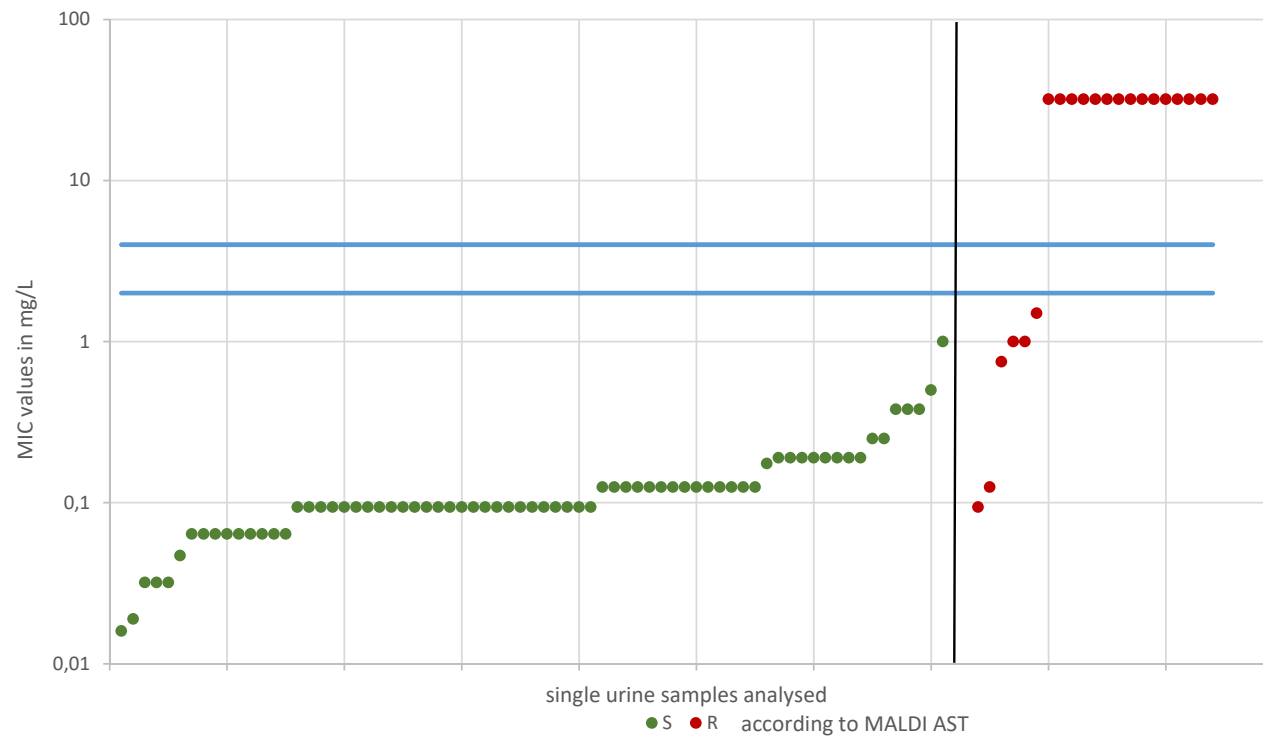

**Figure S 2.** Cotrimoxazole results: Each bacteria sample from a patient's urine (on the X-axis) is assigned a respective MIC value from the MIC test strip (on the Y-axis). Each dot represents one sample. All samples are grouped by MALDI AST results (S, R) and ascending MIC values. Green dots indicate a susceptible result, and red dots indicate a resistant result in the MALDI AST assay (separated by the black line). The MIC value breakpoints are 2 mg/L and 8 mg/L (blue lines).

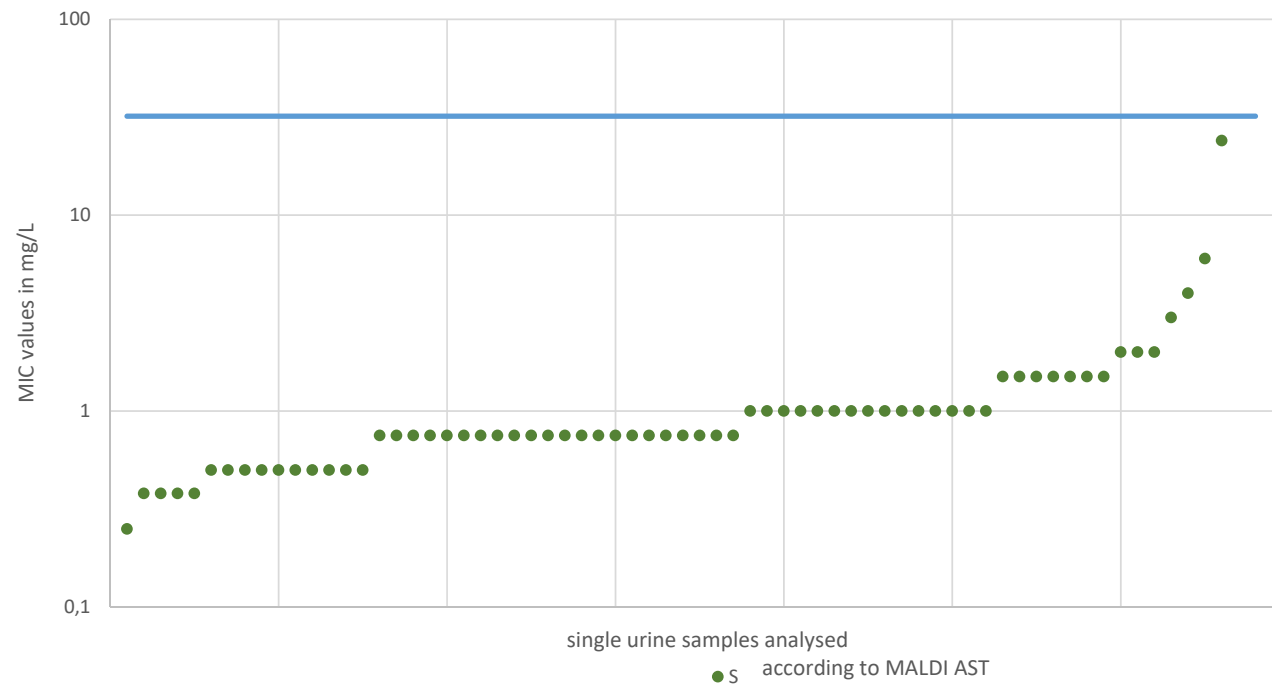

**Figure S 3.** Fosfomycin results: Each bacteria sample from a patient's urine (on the X-axis) is assigned a respective MIC value from the MIC test strip (on the Y-axis). Each dot represents one sample. All samples are grouped by MALDI AST results (S, R) and ascending MIC values. Green dots indicate a susceptible result, and red dots indicate a resistant result in the MALDI AST assay (separated by the black line). The MIC value breakpoint is 32 mg/L (blue line).

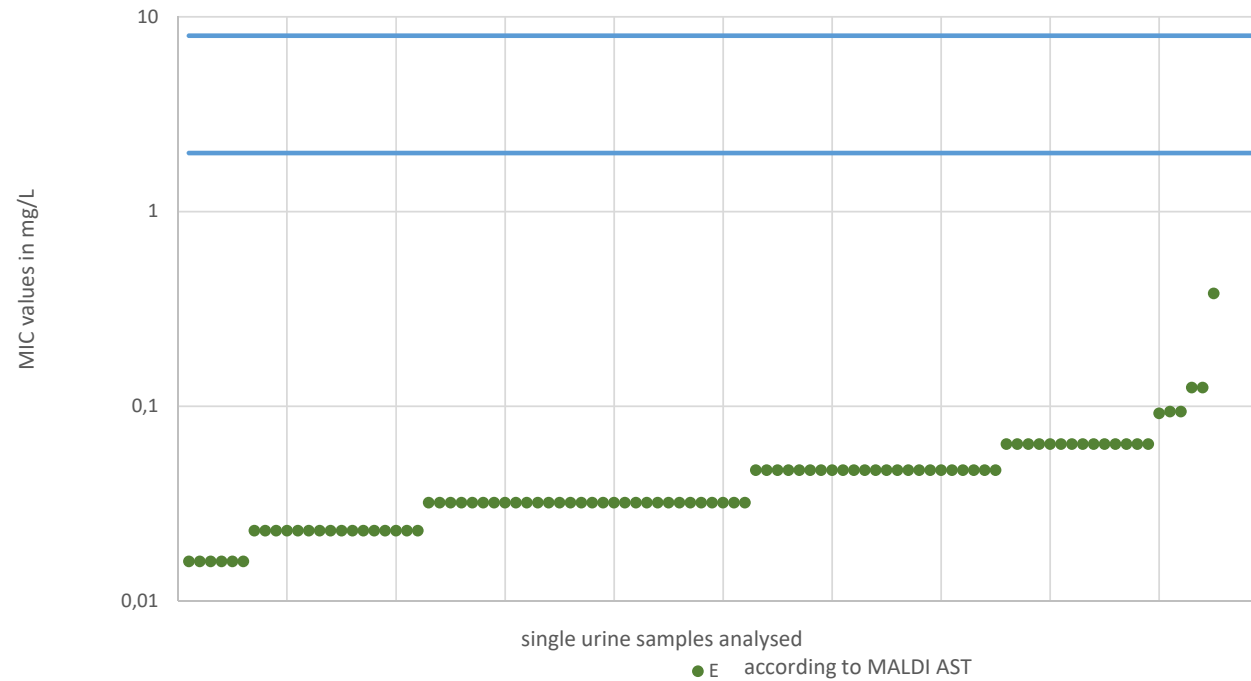

**Figure S 4.** Meropenem results: Each bacteria sample from a patient's urine (on the X-axis) is assigned a respective MIC value from the MIC test strip (on the Y-axis). Each dot represents one sample. All samples are grouped by MALDI AST results (S, R) and ascending MIC values. Green dots indicate a susceptible result, and red dots indicate a resistant result in the MALDI AST assay (separated by the black line). The MIC values breakpoints are 2 mg/L and 8 mg/L (blue lines).

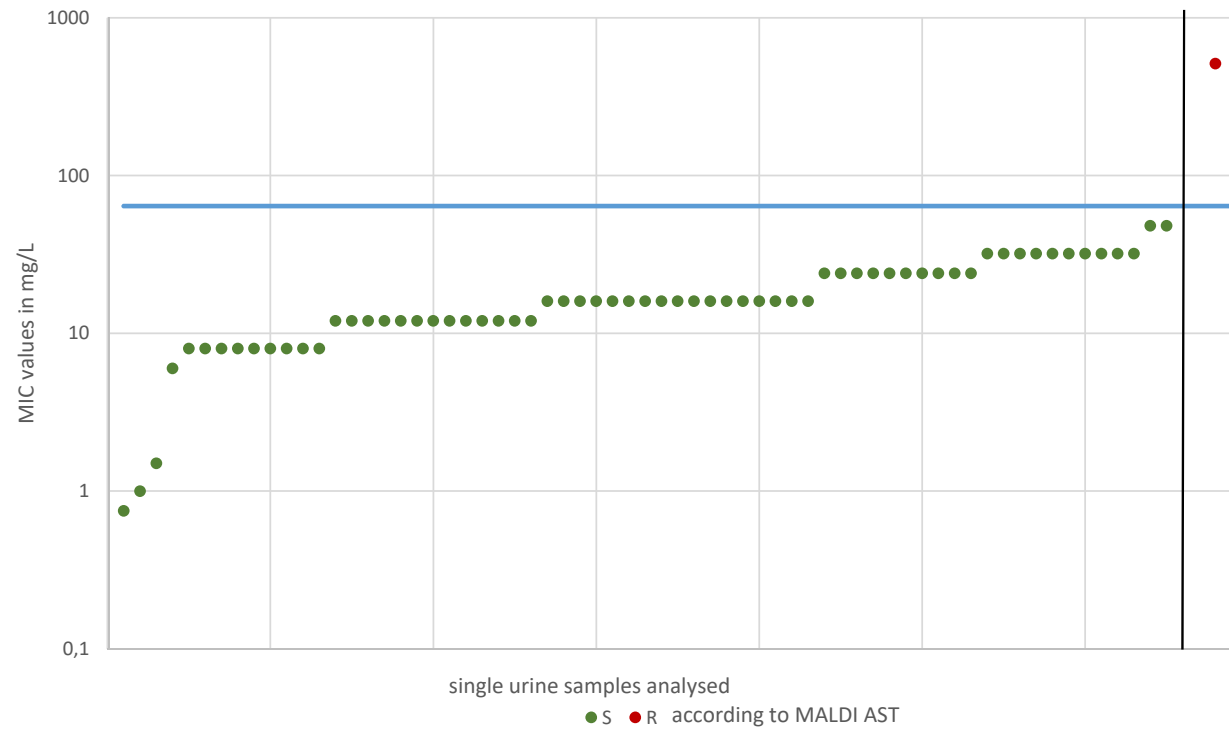

**Figure S 5.** Nitrofurantoin results: Each bacteria sample from a patient's urine (on the X-axis) is assigned a respective MIC value from the MIC test strip (on the Y-axis). Each dot represents one sample. All samples are grouped by MALDI AST results (S, R) and ascending MIC values. Green dots indicate a susceptible result, and red dots indicate a resistant result in the MALDI AST assay (separated by the black line). The MIC value breakpoint is 64 mg/L (blue line).

| CFU/ml          | uropathogens                | MALDI AST |     |     |    |     |     | Conventional AST |      |       |      |       |      |
|-----------------|-----------------------------|-----------|-----|-----|----|-----|-----|------------------|------|-------|------|-------|------|
|                 |                             | CIP       | CEF | STX | FF | MEM | NIF | CIP              | CEF  | STX   | FF   | MEM   | NIF  |
| 10 <sup>5</sup> | <i>Citrobacter freundii</i> | E         | -   | E   | -  | E   | -   | 0.012            | -    | 0.19  | -    | 0.023 | -    |
| 10 <sup>5</sup> | <i>Citrobacter koseri</i>   | E         | -   | E   | -  | E   | -   | 0.012            | -    | 0.19  | -    | 0.032 | -    |
| 10 <sup>5</sup> | <i>E. coli</i>              | E         | E   | E   | E  | E   | E   | 0.008            | 0.75 | 0.094 | 1.5  | 0.016 | 24   |
| 10 <sup>5</sup> | <i>E. coli</i>              | E         | E   | E   | E  | E   | E   | 0.008            | 1.5  | 0.094 | 0.75 | 0.016 | 16   |
| 10 <sup>5</sup> | <i>E. coli</i>              | E         | E   | E   | E  | E   | E   | 0.06             | 1.5  | 0.094 | 1    | 0.023 | 12   |
| 10 <sup>5</sup> | <i>E. coli</i>              | E         | E   | E   | E  | E   | E   | 0.008            | 2    | 0.032 | 0.38 | 0.016 | 8    |
| 10 <sup>5</sup> | <i>E. coli</i>              | E         | E   | E   | E  | E   | E   | 0.012            | 2    | 0.064 | 0.5  | 0.032 | 16   |
| 10 <sup>5</sup> | <i>E. coli</i>              | E         | E   | E   | E  | E   | E   | 0.008            | 2    | 0.064 | 0.75 | 0.047 | 8    |
| 10 <sup>5</sup> | <i>E. coli</i>              | E         | E   | E   | E  | E   | E   | 0.008            | 2    | 0.064 | 3    | 0.064 | 32   |
| 10 <sup>5</sup> | <i>E. coli</i>              | E         | E   | E   | E  | E   | E   | 0.012            | 2    | 0.094 | 0.75 | 0.016 | 0.75 |
| 10 <sup>5</sup> | <i>E. coli</i>              | E         | E   | E   | E  | E   | E   | 0.016            | 2    | 0.094 | 0.75 | 0.023 | 16   |
| 10 <sup>5</sup> | <i>E. coli</i>              | E         | E   | E   | E  | E   | E   | 0.19             | 2    | 0.094 | 1    | 0.032 | 8    |
| 10 <sup>5</sup> | <i>E. coli</i>              | E         | E   | E   | E  | E   | E   | 0.012            | 2    | 0.125 | 0.38 | 0.023 | 16   |
| 10 <sup>5</sup> | <i>E. coli</i>              | E         | E   | E   | E  | E   | E   | 0.012            | 2    | 0.125 | 0.5  | 0.047 | 12   |
| 10 <sup>5</sup> | <i>E. coli</i>              | E         | E   | R   | E  | E   | E   | 0.125            | 2    | > 32  | 0.5  | 0.092 | 32   |
| 10 <sup>5</sup> | <i>E. coli</i>              | E         | E   | E   | E  | E   | E   | 0.016            | 3    | 0.032 | 1    | 0.023 | 1.5  |
| 10 <sup>5</sup> | <i>E. coli</i>              | E         | E   | E   | E  | E   | E   | 0.012            | 3    | 0.064 | 1    | 0.023 | 16   |
| 10 <sup>5</sup> | <i>E. coli</i>              | E         | E   | E   | E  | E   | E   | 0.006            | 3    | 0.064 | 24   | 0.023 | 8    |
| 10 <sup>5</sup> | <i>E. coli</i>              | E         | E   | E   | E  | E   | E   | 0.008            | 3    | 0.094 | 0.38 | 0.023 | 12   |
| 10 <sup>5</sup> | <i>E. coli</i>              | E         | E   | E   | E  | E   | E   | 0.012            | 3    | 0.094 | 0.25 | 0.032 | 24   |
| 10 <sup>5</sup> | <i>E. coli</i>              | E         | E   | E   | E  | E   | E   | 0.008            | 3    | 0.094 | 0.75 | 0.032 | 32   |
| 10 <sup>5</sup> | <i>E. coli</i>              | E         | E   | E   | E  | E   | E   | 0.012            | 3    | 0.094 | 1.5  | 0.032 | 48   |
| 10 <sup>5</sup> | <i>E. coli</i>              | E         | E   | E   | E  | E   | E   | 0.012            | 3    | 0.125 | 0.5  | 0.032 | 16   |
| 10 <sup>5</sup> | <i>E. coli</i>              | E         | E   | E   | E  | E   | E   | 0.008            | 3    | 0.125 | 1    | 0.032 | 24   |
| 10 <sup>5</sup> | <i>E. coli</i>              | E         | E   | E   | E  | E   | E   | 0.008            | 3    | 0.175 | 0.75 | 0.047 | 8    |
| 10 <sup>5</sup> | <i>E. coli</i>              | E         | E   | R   | E  | E   | E   | 0.006            | 3    | 1     | 2    | 0.032 | 6    |
| 10 <sup>5</sup> | <i>E. coli</i>              | E         | E   | R   | E  | E   | E   | 0.008            | 3    | 1.5   | 1    | 0.032 | 24   |
| 10 <sup>5</sup> | <i>E. coli</i>              | R         | E   | R   | E  | E   | E   | 6                | 3    | > 32  | 0.5  | 0.016 | 32   |

| CFU/ml          | uropathogens   | MALDI AST |     |     |    |     |     | Conventional AST |     |       |      |       |     |
|-----------------|----------------|-----------|-----|-----|----|-----|-----|------------------|-----|-------|------|-------|-----|
|                 |                | CIP       | CEF | STX | FF | MEM | NIF | CIP              | CEF | STX   | FF   | MEM   | NIF |
| 10 <sup>5</sup> | <i>E. coli</i> | E         | E   | R   | E  | E   | E   | 0.047            | 3   | > 32  | 1    | 0.023 | 12  |
| 10 <sup>5</sup> | <i>E. coli</i> | E         | E   | E   | E  | E   | E   | 0.012            | 4   | 0.064 | 1.5  | 0.047 | 16  |
| 10 <sup>5</sup> | <i>E. coli</i> | E         | E   | E   | E  | E   | E   | 0.008            | 4   | 0.094 | 0.75 | 0.032 | 16  |
| 10 <sup>5</sup> | <i>E. coli</i> | E         | E   | E   | E  | E   | E   | 0.008            | 4   | 0.094 | 1    | 0.032 | 32  |
| 10 <sup>5</sup> | <i>E. coli</i> | E         | E   | E   | E  | E   | E   | 0.008            | 4   | 0.094 | 0.5  | 0.032 | 16  |
| 10 <sup>5</sup> | <i>E. coli</i> | E         | E   | E   | E  | E   | E   | 0.012            | 4   | 0.125 | 0.75 | 0.032 | 32  |
| 10 <sup>5</sup> | <i>E. coli</i> | E         | E   | E   | E  | E   | E   | 0.012            | 4   | 0.38  | 4    | 0.023 | 24  |
| 10 <sup>5</sup> | <i>E. coli</i> | E         | E   | E   | E  | E   | E   | 0.016            | 4   | 0.125 | 1    | 0.032 | 32  |
| 10 <sup>5</sup> | <i>E. coli</i> | R         | E   | R   | E  | E   | E   | 0.19             | 4   | 0.75  | 1    | 0.047 | 12  |
| 10 <sup>5</sup> | <i>E. coli</i> | E         | E   | R   | E  | E   | E   | 0.008            | 4   | > 32  | 0.75 | 0.032 | 24  |
| 10 <sup>5</sup> | <i>E. coli</i> | R         | E   | R   | E  | E   | E   | 6                | 4   | > 32  | 0.75 | 0.047 | 32  |
| 10 <sup>5</sup> | <i>E. coli</i> | E         | E   | E   | E  | E   | E   | 0.008            | 6   | 0.19  | 0.75 | 0.032 | 16  |
| 10 <sup>5</sup> | <i>E. coli</i> | R         | E   | R   | E  | E   | E   | > 32             | 24  | > 32  | 0.75 | 0.047 | 16  |
| 10 <sup>5</sup> | <i>E. coli</i> | E         | E   | E   | E  | E   | E   | 0.006            | 2   | 0.094 | 0.38 | 0.032 | 12  |
| 10 <sup>5</sup> | <i>E. coli</i> | E         | E   | E   | E  | E   | E   | 0.023            | 12  | 0.094 | 1.5  | 0.047 | 12  |
| 10 <sup>5</sup> | <i>E. coli</i> | R         | E   | R   | E  | E   | E   | > 32             | 12  | > 32  | 1.5  | 0.023 | 8   |
| 10 <sup>5</sup> | <i>E. coli</i> | E         | E   | E   | E  | E   | E   | 0.008            | 3   | 0.125 | 0.75 | 0.032 | 16  |
| 10 <sup>4</sup> | <i>E. coli</i> | E         | E   | E   | E  | E   | E   | 0.012            | 4   | 0.016 | 1    | 0.032 | 16  |
| 10 <sup>5</sup> | <i>E. coli</i> | E         | E   | E   | E  | E   | E   | 0.008            | 6   | 0.25  | 1    | 0.047 | 24  |
| 10 <sup>5</sup> | <i>E. coli</i> | R         | R   | R   | E  | E   | E   | > 32             | 1.5 | > 32  | 0.75 | 0.047 | 16  |
| 10 <sup>5</sup> | <i>E. coli</i> | R         | R   | E   | E  | E   | E   | 4                | 3   | 0.094 | 0.5  | 0.047 | 16  |
| 10 <sup>5</sup> | <i>E. coli</i> | E         | R   | R   | E  | E   | E   | 0.008            | 3   | 0.125 | 6    | 0.047 | 48  |

| CFU/ml          | uropathogens                | MALDI AST |     |     |    |     |     | Conventional AST |       |       |      |       |       |
|-----------------|-----------------------------|-----------|-----|-----|----|-----|-----|------------------|-------|-------|------|-------|-------|
|                 |                             | CIP       | CEF | STX | FF | MEM | NIF | CIP              | CEF   | STX   | FF   | MEM   | NIF   |
| 10 <sup>5</sup> | <i>E. coli</i>              | R         | R   | E   | E  | E   | E   | 0.19             | 4     | 0.064 | 0.5  | 0.032 | 12    |
| 10 <sup>5</sup> | <i>E. coli</i>              | E         | R   | E   | E  | E   | E   | 0.012            | 4     | 0.125 | 0.75 | 0.032 | 16    |
| 10 <sup>5</sup> | <i>E. coli</i>              | R         | R   | R   | E  | E   | E   | > 32             | 12    | > 32  | 0.5  | 0.032 | 12    |
| 10 <sup>5</sup> | <i>E. coli</i>              | E         | R   | E   | E  | E   | E   | 0.032            | 24    | 0.094 | 1.5  | 0.032 | 8     |
| 10 <sup>5</sup> | <i>E. coli</i>              | E         | R   | E   | E  | E   | E   | 0.016            | 8     | 0.064 | 2    | 0.064 | 32    |
| 10 <sup>5</sup> | <i>E. coli</i>              | R         | R   | E   | E  | E   | E   | > 32             | 8     | 0.19  | 1    | 0.032 | 32    |
| 10 <sup>5</sup> | <i>E. coli</i>              | R         | R   | E   | E  | E   | E   | > 32             | > 256 | 0.094 | 1    | 0.023 | 8     |
| 10 <sup>5</sup> | <i>E. coli</i>              | R         | R   | R   | E  | E   | E   | > 32             | > 256 | > 32  | 0.75 | 0.047 | 8     |
| 10 <sup>5</sup> | <i>E. coli</i>              | E         | -   | -   | E  | E   | R   | 0.047            | -     | -     | 0.75 | 0.064 | > 512 |
| 10 <sup>5</sup> | <i>E. coli</i>              | E         | -   | -   | E  | E   | E   | 0.008            | -     | -     | 0.75 | 0.047 | 12    |
| 10 <sup>5</sup> | <i>E. coli</i>              | E         | E   | E   | E  | E   | E   | 0.008            | 3     | 0.125 | 0.75 | 0.023 | 12    |
| 10 <sup>5</sup> | <i>E. coli</i>              | E         | E   | E   | E  | E   | E   | 0.012            | 3     | 0.38  | 1.5  | 0.016 | 24    |
| 10 <sup>5</sup> | <i>E. coli</i>              | E         | E   | E   | E  | E   | E   | 0.008            | 4     | 0.125 | 1    | 0.047 | 24    |
| 10 <sup>5</sup> | <i>E. coli</i>              | E         | E   | E   | E  | E   | E   | 0.012            | 3     | 0.094 | 0.5  | 0.047 | 16    |
| 10 <sup>5</sup> | <i>E. coli</i>              | E         | R   | E   | E  | E   | E   | 0.006            | 2     | 0.032 | 0.75 | 0.023 | 1     |
| 10 <sup>5</sup> | <i>E. coli</i>              | E         | R   | E   | E  | E   | E   | 0.008            | 4     | 1     | 0.75 | 0.047 | 12    |
| 10 <sup>5</sup> | <i>E. coli</i>              | R         | R   | E   | E  | E   | E   | 0.064            | > 256 | 0.094 | 0.75 | 0.032 | 12    |
| 10 <sup>5</sup> | <i>E. coli</i>              | R         | R   | R   | E  | E   | E   | > 32             | > 256 | > 32  | 2    | 0.064 | 24    |
| 10 <sup>5</sup> | <i>Enterobacter cloacae</i> | E         | -   | E   | -  | E   | -   | 0.008            | -     | 0.064 | -    | 0.032 | -     |
| 10 <sup>5</sup> | <i>Enterobacter cloacae</i> | E         | -   | R   | -  | E   | -   | 0.006            | -     | 0.094 | -    | 0.032 | -     |
| 10 <sup>5</sup> | <i>Enterobacter cloacae</i> | E         | -   | E   | -  | E   | -   | 0.008            | -     | 0.125 | -    | 0.047 | -     |
| 10 <sup>5</sup> | <i>Enterobacter cloacae</i> | E         | -   | E   | -  | E   | --  | 0.016            | -     | 0.125 | -    | 0.047 | -     |
| 10 <sup>5</sup> | <i>Klebsiella aerogenes</i> | E         | -   | E   | -  | E   | -   | 0.016            | -     | 0.094 | -    | 0.047 | -     |
| 10 <sup>5</sup> | <i>Klebsiella aerogenes</i> | E         | -   | E   | -  | E   | -   | 0.023            | -     | 0.125 | -    | 0.064 | -     |
| 10 <sup>5</sup> | <i>Klebsiella aerogenes</i> | E         | -   | E   | -  | E   | -   | 0.016            | -     | 0.19  | -    | 0.064 | -     |



| CFU/ml          | uropathogens                 | MALDI AST |     |     |    |     |     | Conventional AST |       |       |    |       |     |
|-----------------|------------------------------|-----------|-----|-----|----|-----|-----|------------------|-------|-------|----|-------|-----|
|                 |                              | CIP       | CEF | STX | FF | MEM | NIF | CIP              | CEF   | STX   | FF | MEM   | NIF |
| 10 <sup>5</sup> | <i>Klebsiella oxytoca</i>    | E         | R   | R   | -  | E   | -   | 0.125            | 1.5   | > 32  | -  | 0.032 | -   |
| 10 <sup>5</sup> | <i>Klebsiella oxytoca</i>    | R         | R   | E   | -  | E   | -   | 0.38             | 3     | 0.094 | -  | 0.047 | -   |
| 10 <sup>5</sup> | <i>Klebsiella oxytoca</i>    | E         | R   | E   | -  | E   | -   | 0.008            | 3     | 0.094 | -  | 0.064 | -   |
| 10 <sup>5</sup> | <i>Klebsiella pneumoniae</i> | E         | E   | E   | -  | E   | -   | 0.016            | 1.5   | 0.047 | -  | 0.047 | -   |
| 10 <sup>5</sup> | <i>Klebsiella pneumoniae</i> | E         | E   | E   | -  | E   | -   | 0.023            | 1.5   | 0.19  | -  | 0.064 | -   |
| 10 <sup>5</sup> | <i>Klebsiella pneumoniae</i> | E         | E   | E   | -  | E   | -   | 0.23             | 2     | 0.094 | -  | 0.047 | -   |
| 10 <sup>5</sup> | <i>Klebsiella pneumoniae</i> | E         | E   | R   | -  | E   | -   | 0.023            | 3     | > 32  | -  | 0.047 | -   |
| 10 <sup>5</sup> | <i>Klebsiella pneumoniae</i> | E         | R   | R   | -  | E   | -   | 0.019            | 16    | 1     | -  | 0.023 | -   |
| 10 <sup>5</sup> | <i>Klebsiella pneumoniae</i> | R         | R   | R   | -  | E   | -   | > 32             | > 256 | > 32  | -  | 0.064 | -   |
| 10 <sup>5</sup> | <i>Klebsiella pneumoniae</i> | E         | -   | -   | -  | E   | -   | 0.25             | -     | -     | -  | 0.064 | -   |
| 10 <sup>5</sup> | <i>Morganella morganii</i>   | E         | -   | E   | -  | E   | -   | 0.008            | -     | 0.094 | -  | 0.125 | -   |
| 10 <sup>5</sup> | <i>Proteus mirabilis</i>     | E         | E   | E   | -  | E   | -   | 0.016            | 1     | 0.094 | -  | 0.125 | -   |
| 10 <sup>5</sup> | <i>Proteus mirabilis</i>     | E         | E   | E   | -  | E   | -   | 0.094            | 1     | 0.5   | -  | 0.032 | -   |
| 10 <sup>5</sup> | <i>Proteus mirabilis</i>     | E         | E   | R   | -  | E   | -   | 0.032            | 1     | > 32  | -  | 0.064 | -   |
| 10 <sup>5</sup> | <i>Proteus mirabilis</i>     | E         | R   | E   | -  | E   | -   | 0.016            | 1.5   | 0.25  | -  | 0.38  | -   |
| 10 <sup>5</sup> | <i>Proteus mirabilis</i>     | E         | E   | E   | -  | E   | -   | 0.047            | 1     | 0.38  | -  | 0.094 | -   |
| 10 <sup>5</sup> | <i>Proteus mirabilis</i>     | E         | E   | E   | -  | E   | -   | 0.016            | 1     | 0.019 | -  | 0.064 | -   |
| 10 <sup>5</sup> | <i>Serratia liquefaciens</i> | E         | -   | E   | -  | E   | -   | 0.023            | -     | 0.19  | -  | 0.023 | -   |
| 10 <sup>5</sup> | <i>Serratia marcescens</i>   | E         | -   | E   | -  | E   | -   | 0.125            | -     | 0.125 | -  | 0.064 | -   |
| 10 <sup>5</sup> | <i>Serratia marcescens</i>   | E         | -   | E   | -  | E   | -   | 0.032            | -     | 0.19  | -  | 0.094 | -   |

**Table S 6.** Overview of all urine samples with a MALDI AST and the corresponding bacteria found: All results for antibiotics with breakpoint according to EUCAST were included in this table. The MIC values for conventional AST are in mg/L. CIP: ciprofloxacin, CEF: cefuroxime, STX: cotrimoxazole, FF: fosfomycin, MEM: meropenem, NIF: nitrofurantoin

| CFU/ml          |                              | CIP | CEF | STX | FF | MEM | NIF |
|-----------------|------------------------------|-----|-----|-----|----|-----|-----|
|                 | MS-ASTRA assay               | S   | R   | S   | S  | S   | S   |
| 10 <sup>5</sup> | <i>Klebsiella pneumoniae</i> | S   | S   | S   | -  | S   | -   |
| 10 <sup>5</sup> | <i>E. coli</i>               | S   | S   | S   | S  | S   | S   |
|                 |                              |     |     |     |    |     |     |
|                 | MS-ASTRA assay               | S   | R   | S   | S  | S   | S   |
| 10 <sup>5</sup> | <i>E. coli</i>               | S   | S   | S   | S  | S   | S   |
| 10 <sup>5</sup> | <i>Klebsiella pneumoniae</i> | S   | S   | S   | -  | S   | -   |
| 10 <sup>5</sup> | <i>Proteus vulgaris</i>      | S   | -   | S   | -  | S   | -   |
|                 |                              |     |     |     |    |     |     |
|                 | MS-ASTRA assay               | S   | S   | S   | -  | S   | S   |
| 10 <sup>5</sup> | <i>Klebsiella pneumoniae</i> | S   | S   | S   | -  | S   | S   |
| 10 <sup>4</sup> | <i>Proteus mirabilis</i>     | R   | S   | R   | -  | S   | -   |
|                 |                              |     |     |     |    |     |     |
|                 | MS-ASTRA assay               | S   | R   | S   | S  | S   | S   |
| 10 <sup>5</sup> | <i>E. coli</i>               | S   | S   | S   | R  | S   | S   |
| 10 <sup>5</sup> | <i>Klebsiella pneumoniae</i> | S   | S   | S   | -  | S   | -   |
|                 |                              |     |     |     |    |     |     |
|                 | MS-ASTRA assay               | S   | R   | S   | -  | S   | -   |
| 10 <sup>5</sup> | <i>Enterobacter cloacae</i>  | S   | -   | S   | -  | S   | -   |
| 10 <sup>5</sup> | <i>Klebsiella oxytoca</i>    | S   | S   | S   | -  | S   | -   |

| CFU/ml          |                                 | CIP | CEF | STX | FF | MEM | NIF |
|-----------------|---------------------------------|-----|-----|-----|----|-----|-----|
|                 | MS-ASTRA assay                  | S   | S   | R   | S  | S   | S   |
| 10 <sup>5</sup> | <i>E. coli</i>                  | S   | S   | R   | S  | S   | S   |
| 10 <sup>5</sup> | <i>Klebsiella pneumoniae</i>    | R   | R   | R   | -  | S   | -   |
|                 |                                 |     |     |     |    |     |     |
|                 | MS-ASTRA assay                  | S   | R   | S   | -  | S   | -   |
| 10 <sup>5</sup> | <i>Klebsiella oxytoca</i>       | S   | S   | S   | -  | S   | -   |
| 10 <sup>5</sup> | <i>Enterobacter cloacae</i>     | S   | -   | S   | -  | S   | -   |
|                 |                                 |     |     |     |    |     |     |
|                 | MS-ASTRA assay                  | S   | R   | S   | S  | S   | S   |
| 10 <sup>5</sup> | <i>E. coli I</i>                | S   | S   | S   | S  | S   | S   |
| 10 <sup>5</sup> | <i>E. coli II</i>               | S   | S   | S   | S  | S   | S   |
|                 |                                 |     |     |     |    |     |     |
|                 | MS-ASTRA assay                  | R   | R   | S   | -  | S   | -   |
| 10 <sup>5</sup> | <i>Klebsiella pneumoniae I</i>  | S   | S   | S   | -  | S   | -   |
| 10 <sup>5</sup> | <i>Klebsiella pneumoniae II</i> | S   | R   | S   | -  | S   | -   |
|                 |                                 |     |     |     |    |     |     |
|                 | MS-ASTRA assay                  | S   | -   | S   | -  | S   | -   |
| 10 <sup>5</sup> | <i>Serratia marcescens</i>      | S   | -   | S   | -  | S   | -   |
| 10 <sup>5</sup> | <i>Morganella morganii</i>      | S   | -   | S   | -  | S   | -   |

**Table S 7.** Overview of urine samples with polymicrobial growth: All results for antibiotics with breakpoint according to EUCAST were included in this table. CIP: ciprofloxacin, CEF: cefuroxime, STX: cotrimoxazole, FF: fosfomycin, MEM: meropenem, NIF: nitrofurantoin
